# Supplementary material for: Inflammatory, Oxidative Stress and Small Cellular Particle Response in HUVEC Induced by Debris from Endoprosthesis Processing
Source: MDPI journal article supplement (doi:10.3390/ma16093287), 2023-04-22
Supplement: s1 [file s1]

## Raw data

### Legend

A: absorbance (arbitrary unit a.u.)

c: concentration (pg/mL)

#### IL-6

| Sample                                       | A1     | A2     | A      | STD A  |
|----------------------------------------------|--------|--------|--------|--------|
| Control                                      | 0.1190 | 0.1220 | 0.1205 | 0.0021 |
| U. Al <sub>2</sub> O <sub>3</sub> 10 µg/mL   | 0.1240 | 0.1350 | 0.1295 | 0.0078 |
| U. Al <sub>2</sub> O <sub>3</sub> 50 µg/mL   | 0.1370 | 0.1290 | 0.1330 | 0.0057 |
| U. Al <sub>2</sub> O <sub>3</sub> 100 µg/mL  | 0.1420 | 0.1440 | 0.1430 | 0.0014 |
| ZrO <sub>2</sub> /SiO <sub>2</sub> 10 µg/mL  | 0.1200 | 0.1180 | 0.1190 | 0.0014 |
| ZrO <sub>2</sub> /SiO <sub>2</sub> 50 µg/mL  | 0.1190 | 0.1280 | 0.1235 | 0.0064 |
| ZrO <sub>2</sub> /SiO <sub>2</sub> 100 µg/mL | 0.1220 | 0.1260 | 0.1240 | 0.0028 |
| Al <sub>2</sub> O <sub>3</sub> 10 µg/mL      | 0.1220 | 0.1280 | 0.1250 | 0.0042 |
| Al <sub>2</sub> O <sub>3</sub> 50 µg/mL      | 0.1190 | 0.1330 | 0.1260 | 0.0099 |
| Al <sub>2</sub> O <sub>3</sub> 100 µg/mL     | 0.1330 | 0.1370 | 0.1350 | 0.0028 |

#### Calibration

| c IL-6                                | A1    | A2    | A      | STD A  |
|---------------------------------------|-------|-------|--------|--------|
| 0                                     | 0.112 | 0.112 | 0.1120 | 0.0000 |
| 1.37                                  | 0.116 | 0.115 | 0.1155 | 0.0007 |
| 4.12                                  | 0.116 | 0.114 | 0.1150 | 0.0014 |
| 12.35                                 | 0.125 | 0.117 | 0.1210 | 0.0057 |
| 37.04                                 | 0.154 | 0.147 | 0.1505 | 0.0049 |
| 111.1                                 | 0.265 | 0.256 | 0.2605 | 0.0064 |
| 333.3                                 | 0.542 | 0.455 | 0.4985 | 0.0615 |
| 1000                                  | 1.293 | 1.354 | 1.3235 | 0.0431 |
| A = 0.0012 a.u. mL/pg c + 0.1104 a.u. |       |       |        |        |

#### IL-1 beta

| Sample                                       | A1     | A2     | A      | STD A  |
|----------------------------------------------|--------|--------|--------|--------|
| Control                                      | 0.1560 | 0.1520 | 0.1540 | 0.0028 |
| U. Al <sub>2</sub> O <sub>3</sub> 10 µg/mL   | 0.1880 | 0.1630 | 0.1755 | 0.0177 |
| U. Al <sub>2</sub> O <sub>3</sub> 50 µg/mL   | 0.1620 | 0.2050 | 0.1835 | 0.0304 |
| U. Al <sub>2</sub> O <sub>3</sub> 100 µg/mL  | 0.1730 | 0.1830 | 0.1780 | 0.0071 |
| ZrO <sub>2</sub> /SiO <sub>2</sub> 10 µg/mL  | 0.1590 | 0.1370 | 0.1480 | 0.0156 |
| ZrO <sub>2</sub> /SiO <sub>2</sub> 50 µg/mL  | 0.1810 | 0.1700 | 0.1755 | 0.0078 |
| ZrO <sub>2</sub> /SiO <sub>2</sub> 100 µg/mL | 0.2680 | 0.2640 | 0.2660 | 0.0028 |
| Al <sub>2</sub> O <sub>3</sub> 10 µg/mL      | 0.1490 | 0.1550 | 0.1520 | 0.0042 |
| Al <sub>2</sub> O <sub>3</sub> 50 µg/mL      | 0.1970 | 0.2050 | 0.2010 | 0.0057 |
| Al <sub>2</sub> O <sub>3</sub> 100 µg/mL     | 0.2040 | 0.2070 | 0.2055 | 0.0021 |

#### Calibration

| c IL-1 b                              | A1    | A2    | A      | STD A  |
|---------------------------------------|-------|-------|--------|--------|
| 0                                     | 0.074 | 0.111 | 0.0925 | 0.0262 |
| 0.48                                  | 0.132 | 0.151 | 0.1415 | 0.0134 |
| 1.02                                  | 0.179 | 0.208 | 0.1935 | 0.0205 |
| 2.56                                  | 0.239 | 0.334 | 0.2865 | 0.0672 |
| 6.4                                   | 0.425 | 0.521 | 0.4730 | 0.0679 |
| 16                                    | 0.773 | 0.832 | 0.8025 | 0.0417 |
| 40                                    | 1.33  | 1.287 | 1.3085 | 0.0304 |
| 100                                   | 1.763 | 1.738 | 1.7505 | 0.0177 |
| A = 0.0121 a.u. mL/pg c + 0.0861 a.u. |       |       |        |        |

#### TNF alpha

| Sample                                       | A1     | A2     | A      | STD A  |
|----------------------------------------------|--------|--------|--------|--------|
| Control                                      | 0.0610 | 0.0560 | 0.0585 | 0.0035 |
| U. Al <sub>2</sub> O <sub>3</sub> 10 µg/mL   | 0.0600 | 0.0590 | 0.0595 | 0.0007 |
| U. Al <sub>2</sub> O <sub>3</sub> 50 µg/mL   | 0.0630 | 0.0600 | 0.0615 | 0.0021 |
| U. Al <sub>2</sub> O <sub>3</sub> 100 µg/mL  | 0.0640 | 0.0650 | 0.0645 | 0.0007 |
| ZrO <sub>2</sub> /SiO <sub>2</sub> 10 µg/mL  | 0.0540 | 0.0530 | 0.0535 | 0.0007 |
| ZrO <sub>2</sub> /SiO <sub>2</sub> 50 µg/mL  | 0.0590 | 0.0570 | 0.0580 | 0.0014 |
| ZrO <sub>2</sub> /SiO <sub>2</sub> 100 µg/mL | 0.0590 | 0.0600 | 0.0595 | 0.0007 |
| Al <sub>2</sub> O <sub>3</sub> 10 µg/mL      | 0.0610 | 0.0580 | 0.0595 | 0.0021 |
| Al <sub>2</sub> O <sub>3</sub> 50 µg/mL      | 0.0610 | 0.0620 | 0.0615 | 0.0007 |
| Al <sub>2</sub> O <sub>3</sub> 100 µg/mL     | 0.0620 | 0.0630 | 0.0625 | 0.0007 |

#### Calibration

| c TNF                                 | A1     | A2     | A      | STD A  |
|---------------------------------------|--------|--------|--------|--------|
| 0.00                                  | 0.0110 | 0.0320 | 0.0215 | 0.0148 |
| 15.60                                 | 0.0920 | 0.0850 | 0.0885 | 0.0049 |
| 31.20                                 | 0.1660 | 0.1700 | 0.1680 | 0.0028 |
| 61.50                                 | 0.3200 | 0.3100 | 0.3150 | 0.0071 |
| 125.00                                | 0.4800 | 0.4820 | 0.4810 | 0.0014 |
| 250.00                                | 0.7300 | 0.7000 | 0.7150 | 0.0212 |
| 500.00                                | 1.7400 | 1.6600 | 1.7000 | 0.0566 |
| A = 0.0032 a.u. mL/pg c + 0.0484 a.u. |        |        |        |        |

### Legend

A: Absorbance (arbitrary unit a.u.)

K = dA/dt (a.u./min)

c: concentration (mg/mL)

ChE

| Sample              | K1     | K2     | K3     | K      | STD K  |
|---------------------|--------|--------|--------|--------|--------|
| Control             | 0.0412 | 0.0480 | 0.0440 | 0.0444 | 0.0034 |
| U. Al2O3 10 µg/mL   | 0.0285 | 0.0279 | 0.0310 | 0.0291 | 0.0016 |
| U. Al2O3 50 µg/mL   | 0.0515 | 0.0669 | 0.0626 | 0.0603 | 0.0080 |
| U. Al2O3 100 µg/mL  | 0.0566 | 0.0561 | 0.0557 | 0.0561 | 0.0004 |
| ZrO2/SiO2 10 µg/mL  | 0.0341 | 0.0333 | 0.0329 | 0.0335 | 0.0006 |
| ZrO2/SiO2 50 µg/mL  | 0.0238 | 0.0291 | 0.0284 | 0.0271 | 0.0029 |
| ZrO2/SiO2 100 µg/mL | 0.0366 | 0.0381 | 0.0373 | 0.0373 | 0.0007 |
| Al2O3 10 µg/mL      | 0.0417 | 0.0414 | 0.0496 | 0.0442 | 0.0047 |
| Al2O3 50 µg/mL      | 0.0531 | 0.0617 | 0.0577 | 0.0575 | 0.0043 |
| Al2O3 100 µg/mL     | 0.0976 | 0.0967 | 0.0953 | 0.0965 | 0.0012 |

| Sample        | A       | c      |
|---------------|---------|--------|
| Control       | 0.30545 | 0.3226 |
| U. Al2O3 10   | 0.2039  | 0.1960 |
| U. Al2O3 50   | 0.34235 | 0.3685 |
| U. Al2O3 100  | 0.2047  | 0.1970 |
| ZrO2/SiO2 10  | 0.0645  | 0.0223 |
| ZrO2/SiO2 50  | 0.12655 | 0.0996 |
| ZrO2/SiO2 100 | 0.2731  | 0.2822 |
| Al2O3 10      | 0.26125 | 0.2675 |
| Al2O3 50      | 0.2366  | 0.2368 |
| Al2O3 100     | 0.35445 | 0.3836 |

GST

| Sample label        | K1   | K2     | K3     | K      | STD K  |
|---------------------|------|--------|--------|--------|--------|
| Control             | 0.01 | 0.0055 | 0.0053 | 0.0054 | 0.0001 |
| U. Al2O3 10 µg/mL   | 0.01 | 0.0053 | 0.0054 | 0.0054 | 0.0001 |
| U. Al2O3 50 µg/mL   | 0.01 | 0.0069 | 0.0068 | 0.0071 | 0.0005 |
| U. Al2O3 100 µg/mL  | 0.01 | 0.0090 | 0.0087 | 0.0088 | 0.0002 |
| ZrO2/SiO2 10 µg/mL  | 0.00 | 0.0043 | 0.0045 | 0.0043 | 0.0002 |
| ZrO2/SiO2 50 µg/mL  | 0.01 | 0.0061 | 0.0066 | 0.0062 | 0.0003 |
| ZrO2/SiO2 100 µg/mL | 0.01 | 0.0053 | 0.0053 | 0.0053 | 0.0000 |
| Al2O3 10 µg/mL      | 0.01 | 0.0051 | 0.0049 | 0.0050 | 0.0001 |
| Al2O3 50 µg/mL      | 0.00 | 0.0036 | 0.0042 | 0.0039 | 0.0003 |
| Al2O3 100 µg/mL     | 0.01 | 0.0056 | 0.0057 | 0.0058 | 0.0002 |

Calibration (bovine serum albumin (BSA))

| c BSA                                 | A1    | A2    | A      | A - A(0) |
|---------------------------------------|-------|-------|--------|----------|
| 0                                     | 0.096 | 0.103 | 0.0995 | 0        |
| 0.0625                                | 0.173 | 0.175 | 0.174  | 0.072    |
| 0.125                                 | 0.241 | 0.248 | 0.2445 | 0.145    |
| 0.25                                  | 0.371 | 0.368 | 0.3695 | 0.265    |
| 0.5                                   | 0.612 | 0.602 | 0.607  | 0.499    |
| 1.00                                  | 1.00  | 0.989 | 0.9955 | 0.886    |
| 2.00                                  | 1.73  | 1.722 | 1.728  | 1.619    |
| A = 0.8025 a.u. mL/mg c + 0.0466 a.u. |       |       |        |          |

### Legend

MFI: median fluorescence intensity (/µL)

ROS: reactive oxygen species

LD: lipid droplets

|                     | ROS  |      |
|---------------------|------|------|
|                     | MFI1 | MFI2 |
| Control             | 486  | 618  |
| ROS+                | 1742 |      |
| LD+                 |      |      |
| u. Al2O3 10 µl/mL   | 214  | 665  |
| u. Al2O3 50 µl/mL   | 756  | 692  |
| u. Al2O3 100 µl/mL  | 1044 | 512  |
| ZrO2/SiO2 10 µl/mL  | 1412 | 350  |
| ZrO2/SiO2 50 µl/mL  | 364  | 457  |
| ZrO2/SiO2 100 µl/mL | 598  | 373  |
| Al2O3 10 µl/mL      | 722  | 714  |
| Al2O3 50 µl/mL      | 1155 | 891  |
| Al2O3 100 µl/mL     | 549  | 589  |

| LD   |      |
|------|------|
| MFI1 | MFI2 |
| 4533 | 164  |
|      |      |
| 3204 |      |
| 6723 | 249  |
| 6405 | 266  |
| 6635 | 286  |
| 7673 | 257  |
| 7073 | 247  |
| 6476 | 273  |
| 7556 | 264  |
| 6694 | 242  |
| 6965 | 194  |
